# Supplementary material for: Identifying and utilizing optical properties in the CaSrNb2O7:Pr3+phosphor at low temperature
Source: Royal Society of Chemistry journal article supplement (doi:10.1039/d1tc05798g), 2022-01-01
Supplement: d1tc05798g1.pdf [file d1tc05798g1.pdf]

## Supporting Information

### Identifying and utilizing optical properties in $\text{CaSrNb}_2\text{O}_7$ : $\text{Pr}^{3+}$ phosphor at low temperature

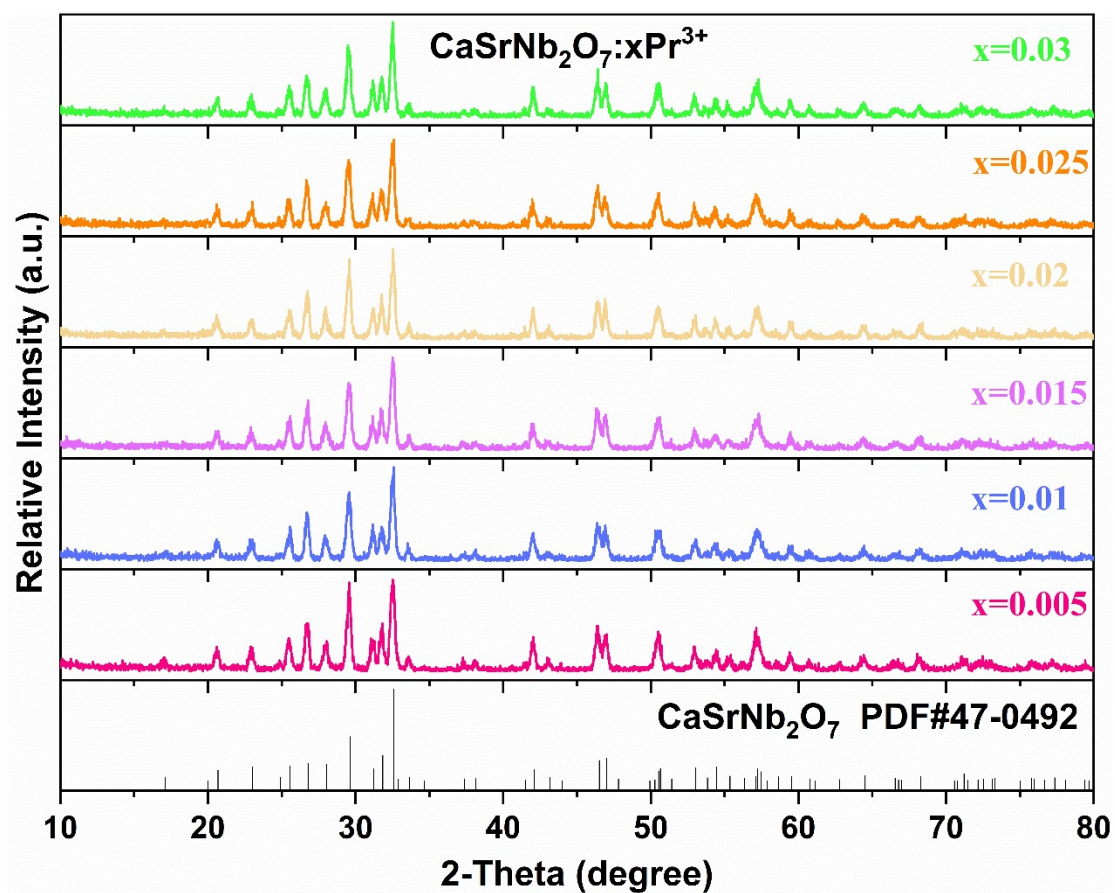

Figure S1. XRD patterns of  $\text{CaSrNb}_2\text{O}_7$ :  $x\text{Pr}^{3+}$  ( $x=0, 0.005, 0.01, 0.015, 0.02, 0.025, 0.03$ ).

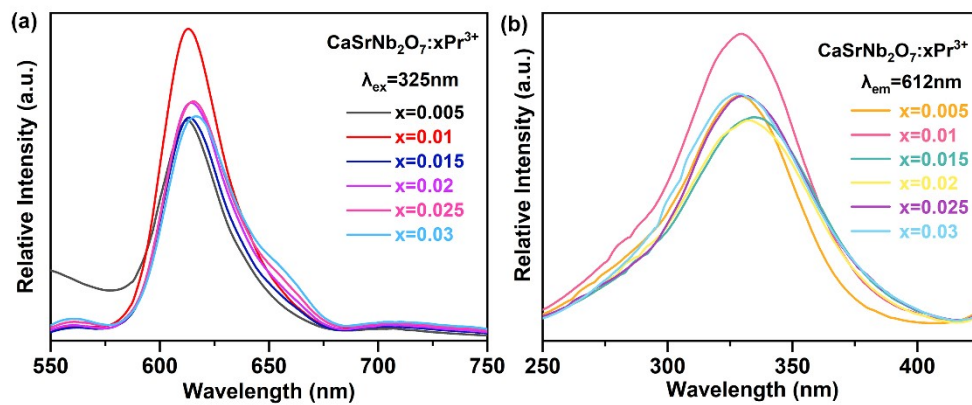

Fig. S2. The PL and PLE spectra of  $\text{CaSrNb}_2\text{O}_7:\text{xPr}^{3+}$  under 325 nm, 612nm, respectively.

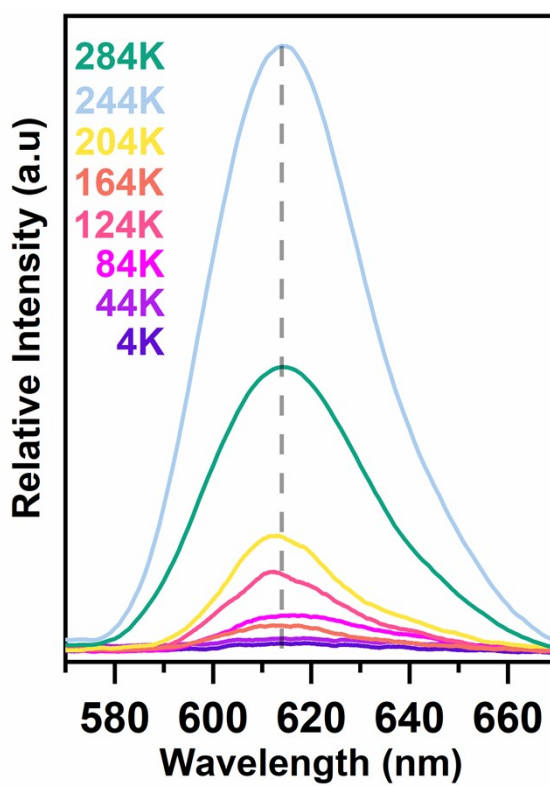

Figure S3. Temperature-dependent LPL spectra of  $\text{CaSrNb}_2\text{O}_7:\text{Pr}^{3+}$ .

Table S1 Rietveld refinement and lattice parameters of the CaSrNb<sub>2</sub>O<sub>7</sub>: 0.01Pr<sup>3+</sup> sample

| Formula                 | CaSrNb <sub>2</sub> O <sub>7</sub> : 0.01Pr <sup>3+</sup> |
|-------------------------|-----------------------------------------------------------|
| Crystal system          | orthorhombic                                              |
| Space group             | Cmc21                                                     |
| a (Å)                   | 3.933(1)                                                  |
| b(Å)                    | 26.726(7)                                                 |
| c (Å)                   | 5.683(4)                                                  |
| Z                       | 4                                                         |
| Volume(Å <sup>3</sup> ) | 597.36(50)                                                |
| R <sub>p</sub> (%)      | 7.91%                                                     |
| R <sub>wp</sub> (%)     | 10.59%                                                    |
| $\chi^2$                | 4.602                                                     |

Table S2 The calculated CIE(x,y) values for CaSrNb<sub>2</sub>O<sub>7</sub>: Pr<sup>3+</sup> and CaSrNb<sub>2</sub>O<sub>7</sub>

| Temperature | CIE (CaSrNb <sub>2</sub> O <sub>7</sub> :Pr <sup>3+</sup> ) | CIE (CaSrNb <sub>2</sub> O <sub>7</sub> ) |
|-------------|-------------------------------------------------------------|-------------------------------------------|
| 4K          | (0.2788,0.2884)                                             | (0.2037,0.2647)                           |
| 44K         | (0.2877,0.2894)                                             | (0.2069,0.2709)                           |
| 84K         | (0.3422,0.3014)                                             | (0.2191,0.2860)                           |
| 124K        | (0.4543,0.3105)                                             | (0.2487,0.2891)                           |
| 164K        | (0.5131,0.3123)                                             | (0.2711,0.2645)                           |
| 204K        | (0.5447,0.3167)                                             | (0.2735,0.2469)                           |
| 244K        | (0.5755,0.3229)                                             | (0.2740,0.2417)                           |
| 284K        | (0.5943,0.3263)                                             | (0.2764,0.2421)                           |
